# Supplementary material for: Revealing the role of metformin in gastric intestinal metaplasia treatment
Source: Front Pharmacol. 2024 Jul 19;15:1340309. doi: 10.3389/fphar.2024.1340309 (PMC11294171; doi:10.3389/fphar.2024.1340309)
Supplement: Supplementary file 1 [file Table2.XLSX]

## Sheet: Sheet1
Molecular name	Targets	Residues	Hydrogen bond length	Binding energy (kcal/Mol)
Metformin	EGFR	ASP-1006;GLU-1005	2.1;1.8;2.1	-5.95
Metformin	MMP9	ASP-131;ASP-206;ASP-207	1.8;1.9;2.5;2.0;2.5	-5.91
Metformin	HIF1A	LYS-75;ASP-77;GLU-79	2.1;1.7;1.9	-5.71
Metformin	HSP90AA1	GLU-62;ASP-102	2.1;1.9	-4.67
Metformin	SIRT1	ASP-289	2.5;2.3;2.0	-2.53
Metformin	IL2	GLU-136;GLU-130	1.8;1.8;2.0;2.3;2.3	-6.18
Metformin	MAPK8	GLU-329;TRP-324	1.8;2.3;1.9	-4.82
Metformin	STAT1	GLU-657	2.1	-3.57
Metformin	PIK3CA	ASP-1017;ASP-454	2.1;2.1;1.9	-5.51
Metformin	ICAM1	GLU-90;ALA-178	1.8;2.6;1.9	-4.45
ANP	EGFR	GLN-791;MET-793;CYS-797;ALA-722;LYS-745;ASP-837;ASN-842;ARG-841	3.0;2.2;2.6;2.0;2.4;2.8;2.3;2.7;2.0	-4.54
PZE	MMP9	-	-	-2.71
SO4	HIF1A	-	-	-2.13
AB4	HSP90AA1	ASP-93;THR-104;LYS-58	2.9;3.0;2.5	-7.53
GOL	SIRT1	ILE-316;ILE-347	2.2;1.8	-0.87
SO4	IL2	LYS-74	2.2	-4.14
EDO	MAPK8	GLU-272;ASP-277	3.0;2.0	-2.29
SO4	STAT1	SER-606;LYS-587;ARG-602	2.9;2.6;2.3;2.1	-5.41
799	PIK3CA	SER-854;GLN-859;VAL-851	2.8;2.8;2.8;1.9	-8.93
NAG	ICAM1	ARG-13;TYR-83;THR-85	2.1;2.1;3.1;3.4	-3.71
