# Supplementary material for: Revealing the role of metformin in gastric intestinal metaplasia treatment
Source: Front Pharmacol. 2024 Jul 19;15:1340309. doi: 10.3389/fphar.2024.1340309 (PMC11294171; doi:10.3389/fphar.2024.1340309)
Supplement: Supplementary file 2 [file Table3.XLSX]

## Sheet: Sheet1
Targets	PDB ID	Method	Resolution	R-Value free	R-Value work	R-Value observed
EGFR	5D41	X-RAY DIFFRACTION	2.31 Å	0.207	0.174	0.175
MMP9	6ESM	X-RAY DIFFRACTION	1.10 Å	0.172	0.156	0.157
HIF1A	1H2K	X-RAY DIFFRACTION	2.15 Å	0.213	0.178	0.18
HSP90AA1	2BZ5	X-RAY DIFFRACTION	1.90 Å	0.254	0.195	0.198
SIRT1	4KXQ	X-RAY DIFFRACTION	1.85 Å	0.189	0.168	0.17
IL2	7M2G	X-RAY DIFFRACTION	1.79 Å	0.228	0.192	0.196
MAPK8	4QTD	X-RAY DIFFRACTION	1.50 Å	0.192	0.166	0.167
STAT1	1BF5	X-RAY DIFFRACTION	2.90 Å	0.293	0.227	0.227
PIK3CA	8EXL	X-RAY DIFFRACTION	1.99 Å	0.225	0.187	0.188
ICAM1	1IAM	X-RAY DIFFRACTION	2.10 Å	0.303	0.214	0.214
