# Supplementary material for: Revealing the role of metformin in gastric intestinal metaplasia treatment
Source: Front Pharmacol. 2024 Jul 19;15:1340309. doi: 10.3389/fphar.2024.1340309 (PMC11294171; doi:10.3389/fphar.2024.1340309)
Supplement: Supplementary file 5 [file Table4.XLSX]

## Sheet: Sheet1
Gene	Forward Primer	Reverse Primer
MUC5AC	CAGGACTCTCTGAAATCGTACCA	AAGGCTCGTACCACAGGGA
CDX2	CAAGGACGTGAGCATGTATCC	GTAACCACCGTAGTCCGGGTA
HIF1A	ACCTTCATCGGAAACTCCAAAG	CTGTTAGGCTGGGAAAAGTTAGG
LDHA	TGTCTCCAGCAAAGACTACTGT	GACTGTACTTGACAATGTTGGGA
MMP9	GCAGAGGCATACTTGTACCG	TGATGTTATGATGGTCCCACTTG
EGFR	GCCATCTGGGCCAAAGATACC	GTCTTCGCATGAATAGGCCAAT
HSP90AA1	AATTGCCCAGTTAATGTCCTTGA	CGTCCGATGAATTGGAGATGAG
SIRT1	GCTGACGACTTCGACGACG	TCGGTCAACAGGAGGTTGTCT
IL2	TGAGCAGGATGGAGAATTACAGG	GTCCAAGTTCATCTTCTAGGCAC
GAPDH	AGGTCGGTGTGAACGGATTTG	TGTAGACCATGTAGTTGAGGTCA
AKT1	ATGAACGACGTAGCCATTGTG	TTGTAGCCAATAAAGGTGCCAT
PI3KCA	ACACCACGGTTTGGACTATGG	GGCTACAGTAGTGGGCTTGG
mTOR	ACCGGCACACATTTGAAGAAG	CTCGTTGAGGATCAGCAAGG
IL-1b	GCAACTGTTCCTGAACTCAACT	ATCTTTTGGGGTCCGTCAACT
ICAM1	GTGATGCTCAGGTATCCATCCA	CACAGTTCTCAAAGCACAGCG
TNF-a	CCCTCACACTCAGATCATCTTCT	GCTACGACGTGGGCTACAG
MAPK8	AGCAGAAGCAAACGTGACAAC	GCTGCACACACTATTCCTTGAG
NFKB	ATGGCAGACGATGATCCCTAC	TGTTGACAGTGGTATTTCTGGTG
IL6	TAGTCCTTCCTACCCCAATTTCC	TTGGTCCTTAGCCACTCCTTC
Foxo3a	CTGGGGGAACCTGTCCTATG	TCATTCTGAACGCGCATGAAG
STAT1	TCACAGTGGTTCGAGCTTCAG	GCAAACGAGACATCATAGGCA
