# Supplementary material for: Revealing the role of metformin in gastric intestinal metaplasia treatment
Source: Front Pharmacol. 2024 Jul 19;15:1340309. doi: 10.3389/fphar.2024.1340309 (PMC11294171; doi:10.3389/fphar.2024.1340309)
Supplement: Supplementary file 6 [file Table1.XLSX]

## Sheet: Sheet1
Database	Website
KEGG	https://www.kegg.jp/kegg/webapp/
GeneCards	https://www.genecards.org
DisGeNET	https://www.disgenet.org
OMIM	https://www.omim.org
Uniprot	https://www.uniprot.org/
SuperPred	http://prediction.charite.de/
Pharm Mapper	http://www.lilab-ecust.cn/pharmmapper/
Swiss Target Prediction	http://swisstargetprediction.ch/
TargetNet	http://targetnet.scbdd.com/home
STRING	https://cn.string-db.org/
Cytoscape	https://cytoscape.org
PubChem	https://pubchem.ncbi.nlm.nih.gov/
PDB	https://www.rcsb.org/
